# Supplementary material for: A Chloroplast-Localized Glucose-6-Phosphate Dehydrogenase Positively Regulates Stripe Rust Resistance in Wheat
Source: MDPI journal article supplement (doi:10.3390/ijms24010459), 2022-12-27
Supplement: s1 [file s1]

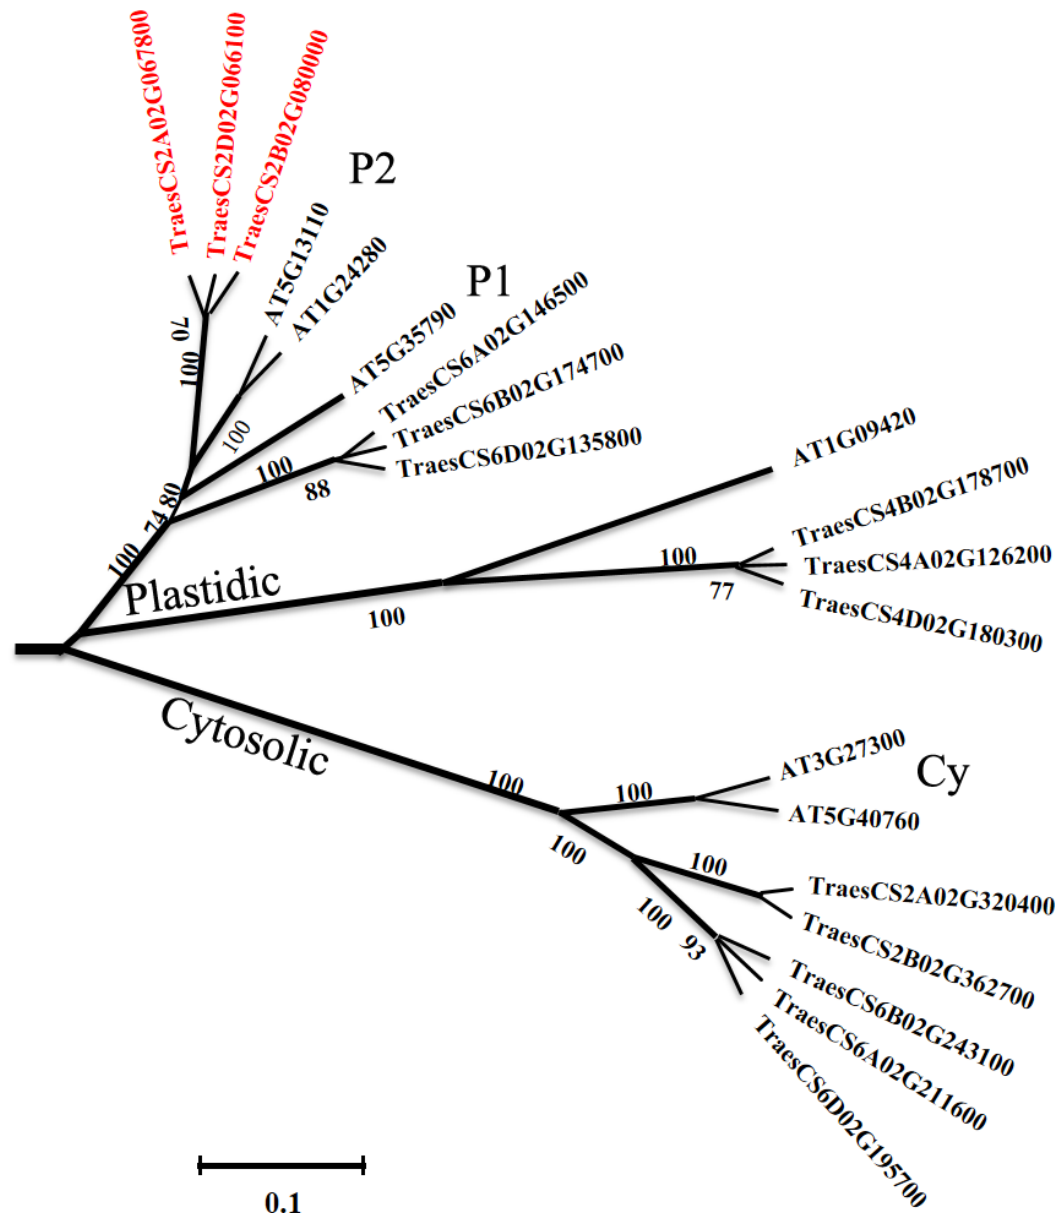

**Supplementary Figure S1** Phylogenetic analysis of TaG6PDHs and AtG6PDHs. MEGA v6 software was used to conduct the analysis using the neighbor-joining method. 1,000 bootstrap replicates were used to calculate the confidence level of the groupings. The numbers adjacent to the branch points represent the percentage of replicates supporting each branch. Branches are labeled with the gene ID from the Ensembl Plants website (<http://plants.ensembl.org>) P1, AT5G35790 (G6PD1); P2, AT5G13110 (G6PD2) and AT1G24280 (G6PD3); Cy, AT3G27300 (G6PD5) and AT5G40760 (G6PD6).

[illegible]

**Supplementary Figure S2** Multi-alignment of the coding sequence of three copies of *TaG6PDH2*. The sequences were obtained from the wheat genome 2A, 2B, and 2D. Two specific regions for VIGS assay were indicated

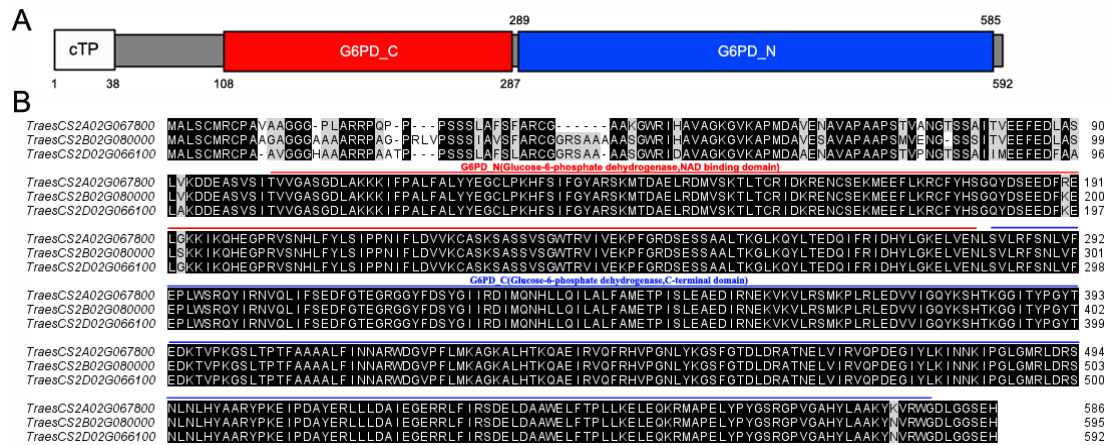

**Supplementary Figure S3** Sequence analysis of TaG6PDH2. (A) Schematic diagram of the TaG6PDH2 domains. cTP, chloroplast-targeting sequence (G6PD\_N = Glucose-6-phosphate dehydrogenase, NAD binding domain, G6PD\_C = Glucose-6-phosphate dehydrogenase, C-terminal domain) (B) Multi-alignment of the TaG6PDH2 protein sequences. Sequences were obtained from the wheat genome 2A, 2B, and 2D. The domains of TaG6PDH2, G6PD\_Ns, and G6PD\_C are indicated.

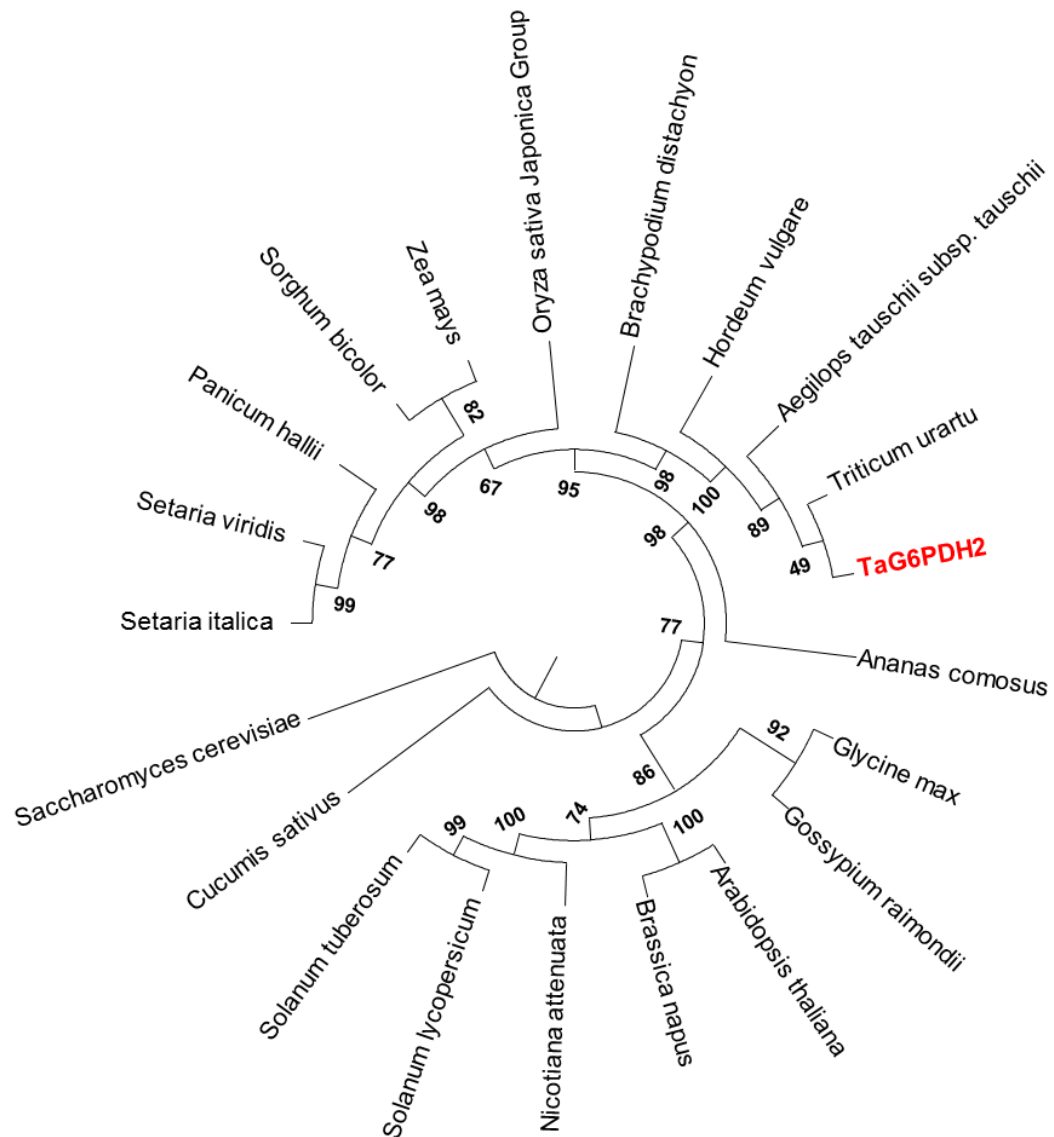

**Supplementary Figure S4** Phylogenetic analysis of TaG6PDH2 and selected homologous proteins from other plants. MEGA v6 software was used to conduct the analysis using the neighbor-joining method. 1,000 bootstrap replicates were used to calculate the confidence level of the groupings. The numbers adjacent to the branch points represent the percentage of replicates supporting each branch. Branches are labeled with the species name.

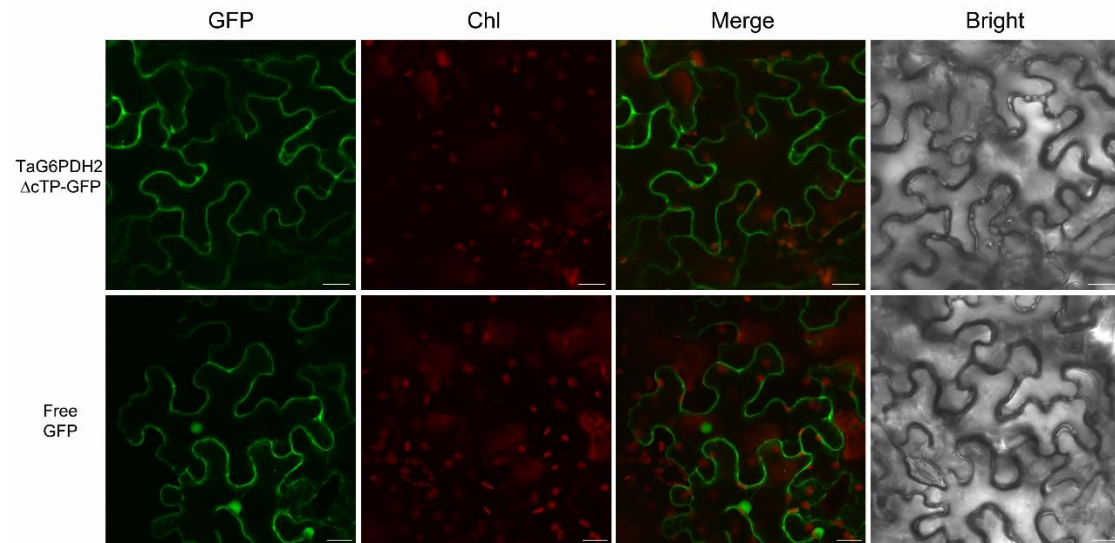

**Supplementary Figure S5** Subcellular localization of TaG6PDH2 $\Delta$ cTP in tobacco leaves. Transient expression of free GFP or TaG6PDH2 $\Delta$ cTP-GFP fusion protein in *N. benthamiana* leaves mediated by *A. tumefaciens*. All signals were detected using an Olympus FV3000 confocal microscope. Scale bars, 20  $\mu$ m. Chl, chlorophyll. GFP fluorescence is shown in green. Red fluorescence represents chlorophyll auto-fluorescence. Bright-field images indicate that identical fields were observed under white light. Merged GFP and chlorophyll images are presented.

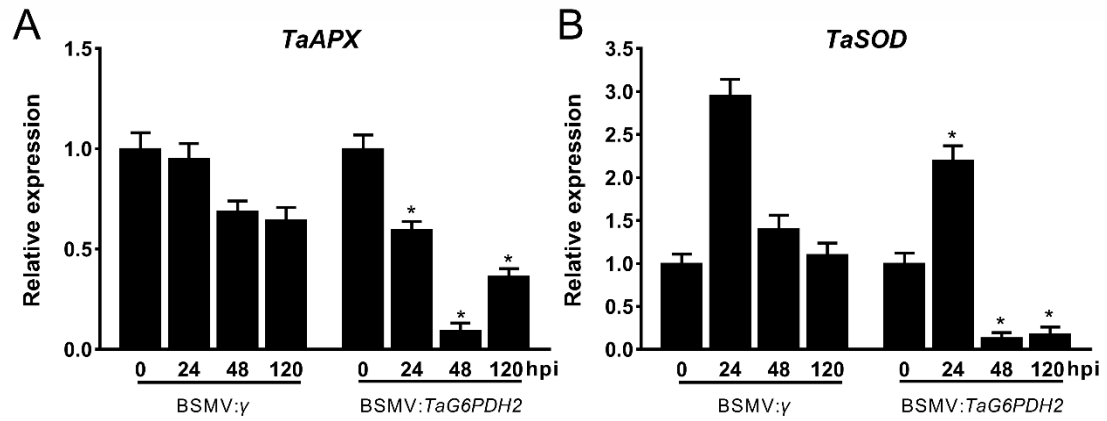

**Supplementary Figure S6** Relative transcript levels of *TaAPX* (A) and *TaSOD* (B) in *TaG6PDH2*-knockdown wheat compared with negative control. *Pst* CYR23-infected wheat leaves were sampled at 0, 24, 48, and 120 hpi. *TaEF* was used as an internal control. Values indicate mean  $\pm$  SD from three independent samples. Asterisks represent significant differences ( $P < 0.05$ ) according to Student's t-test.

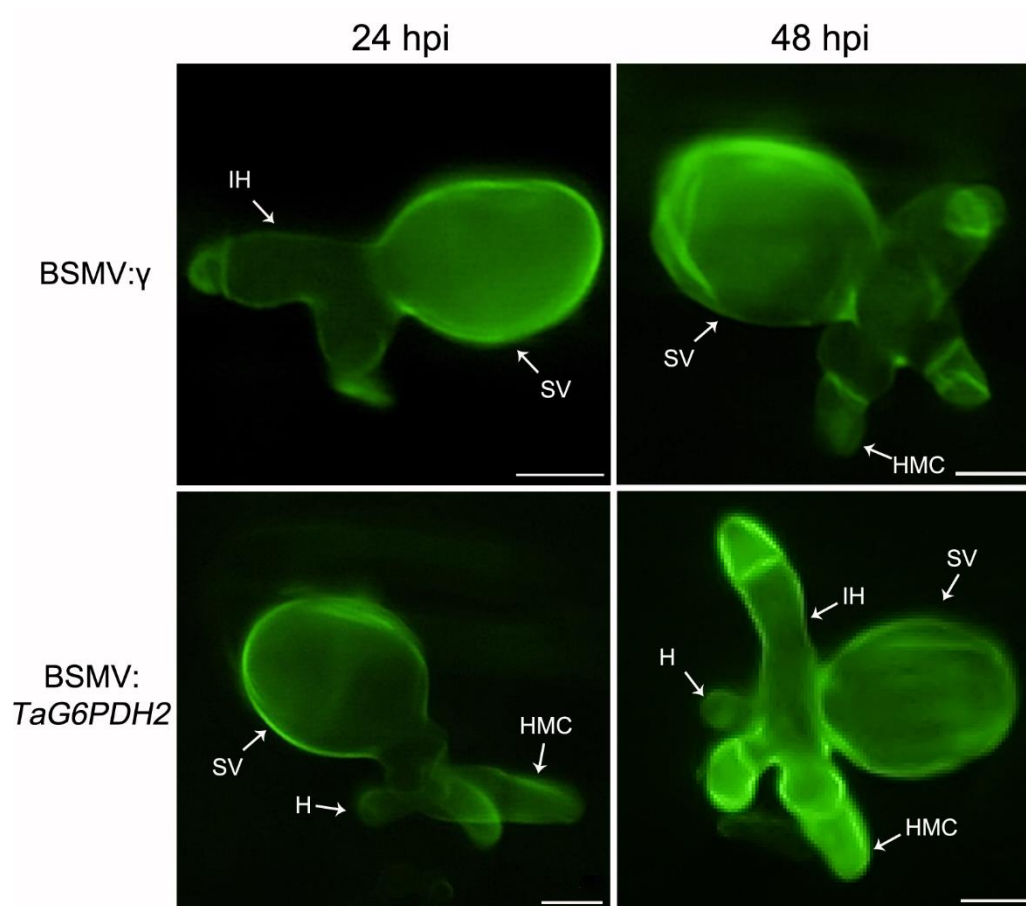

**Supplementary Figure S7** Histological observation of host response on the silenced wheat leaves infected with *Pst* CYR23. Fungal growth, detected by WGA staining, at 24 hpi or 48 hpi in BSMV:γ- and BSMV:TaG6PDH2-treated plants. Scale bars, 20 μm. SV, substomatal vesicle. IH, infection hypha; HMC, haustorial mother cell; H, haustoria.

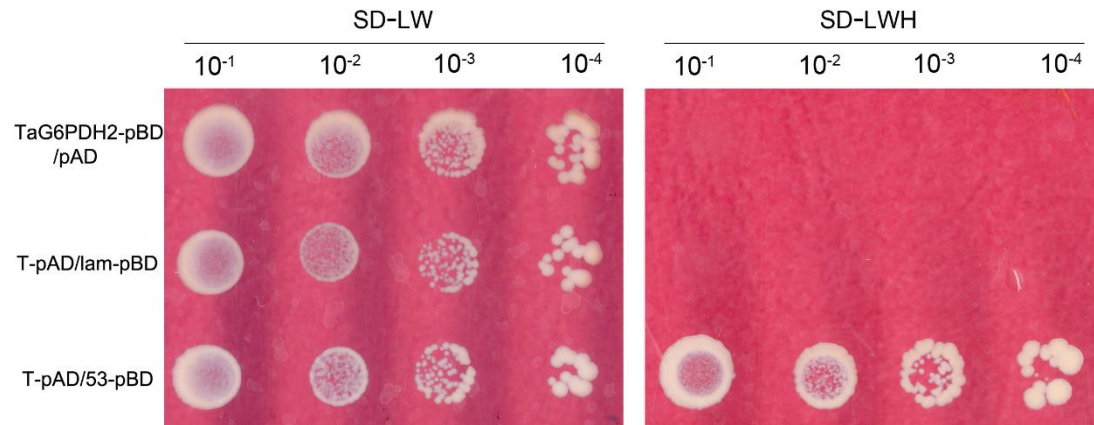

**Supplementary Figure S8** Test for self-activation of *TaG6PDH2*. Yeast strain AH109 containing the indicated pairs of plasmids was normally grown on selective media SD/-LW or SD/-LWH. The growth condition of the plates was observed and photographed 3 days after inoculation. SD, synthetic dropout. W, Tryptophan. L, Leucine. H, Histidine.



**Supplementary Table S1** Candidate interactors (CI)of TaG6PDH2 through the Y2H system

|     | Name                                      | Genbank      | Species                              | Times |
|-----|-------------------------------------------|--------------|--------------------------------------|-------|
| CI1 | 70 kDa heat shock protein                 | GU452716     | Triticum aestivum                    | 6     |
| CI2 | monothiol glutaredoxin-S4                 | XM_044491837 | Triticum aestivum                    | 4     |
| CI3 | ToxA-binding protein 1                    | DQ235271     | Triticum aestivum                    | 4     |
| CI4 | ATP-dependent zinc metalloprotease FTSH 1 | XM_020326324 | Aegilops tauschii<br>subsp. Tauschii | 2     |
| CI5 | protoporphyrinogen oxidase                | XM_020295601 | Aegilops tauschii<br>subsp. Tauschii | 1     |

BLAST through NCBI. <https://blast.ncbi.nlm.nih.gov/Blast.cgi>

**Supplementary Table S2** Primers used in this study.

| Primers                  | Sequences (5'→3') |                                       |
|--------------------------|-------------------|---------------------------------------|
| T-TaG6PDH2               | F                 | ATGGCGCTCTCCTGCA                      |
| T-TaG6PDH2               | R                 | CTAGTGTTCGAGCCA                       |
| pTF486-TaG6PDH2          | F                 | ACAGTCGACTCTAGAGGATCCATGGCGCTCTCCTGCA |
| pTF486-TaG6PDH2          | R                 | GCCCTTGCTCACCATGGATCCGTGTTCCGAGCCA    |
| pCAMBIA1302-TaG6PDH2     | F                 | GGGACTCTTGACCATGGGGATGGCGCTCTCCTGCA   |
| pCAMBIA1302-TaG6PDH2ΔcTP | F                 | GGGACTCTTGACCATGGGGATGGGCGGGAGATCG    |
| pCAMBIA1302-TaG6PDH2     | R                 | CTAGTCAGATCTACCATGGCGTGTTCCGAGCCA     |
| Q-TaG6PDH2               | F                 | TCTGAATAAGTGTGAGCGGTT                 |
| Q-TaG6PDH2               | R                 | AGTTCCAATACAGCAGCCCA                  |
| Q-TaEF                   | F                 | TGGTGTCAATCAAGCCTGGTATGGT             |
| Q-TaEF                   | R                 | ACTCATGGTGCATCTCAACGGACT              |
| pPDR195-TaG6PDH2         | F                 | CAGCCTCGAGGGATCCATGGCGCTCTCCTGCA      |
| pPDR195-TaG6PDH2         | R                 | GTCCAAAGCTGGATCCCTAGTGTTCGAGCCGCCCA   |
| pET15b-TaG6PDH2          | F                 | CAGATTGGCGGCGAATTCATGGCGCTCTCCTGCA    |
| pET15b-TaG6PDH2          | R                 | AGCCGGTTCCTCGAGGTGTTCCGAGCCA          |
| VIGS-TaG6PDH2-as1        | F                 | GCTAGCTGATTAATTAATACTTGTGATACCTCCA    |
| VIGS-TaG6PDH2-as1        | R                 | GCTAGCTGAGCGGCCGCCAAGTAATGGTCAATCCTG  |
| VIGS-TaG6PDH2-as2        | F                 | GCTAGCTGATTAATTAAGGATGGAGTTCCTTTCT    |
| VIGS-TaG6PDH2-as2        | R                 | GCTAGCTGAGCGGCCGCGCTCATTAGTAGCCCTGTCA |
| Q-TaPR1                  | F                 | AAACAACATCCATCAAAACCA                 |
| Q-TaPR1                  | R                 | ATTACCAGGTGGATCATAGTTACA              |
| Q-TaPR2                  | F                 | AGGATGTTGCTTCCATGTTTGCCG              |
| Q-TaPR2                  | R                 | AAGTAGATGCGCATGCCGTTGATG              |
| Q-TaPR5                  | F                 | CAAGCAGTGGTATCAACGCAGAG               |
| Q-TaPR5                  | R                 | GTGAAGCCACAGTTGTTCTTGATGTT            |
| Q-TaSOD                  | F                 | TTGCCAATGCTGAGGGTG                    |
| Q-TaSOD                  | R                 | AATCCAGGTAAACGAGAATG                  |
| Q-TaAPX                  | F                 | TGCGGATTTGTTCCAGTTGG                  |
| Q-TaAPX                  | R                 | GGCATGACCTTCCAAGTGTGTG                |
| pGBKT7-TaG6PDH2          | F                 | GAGGACCTGCATATGATGGCGCTCTCCTGCA       |
| pGBKT7-TaG6PDH2          | R                 | GATCCCCGGGAATTCCTAGTGTTCGAGCCGCCCA    |
| pGADT7-CI1               | F                 | GGAGGCCAGTGAATTCATGGCTACCTTCACTTCCCA  |
| pGADT7-CI1               | R                 | CACCCGGGTGGAATTCTTAATTGCTATCTGTGAAG   |
| pGADT7-CI2               | F                 | GGAGGCCAGTGAATTCATGGCGAGGCTGGTGTG     |
| pGADT7-CI2               | R                 | CACCCGGGTGGAATTCTCACTGGGCACTGTCTTG    |
| pGADT7-CI3               | F                 | GGAGGCCAGTGAATTCATGGCGGCCATATCGTCG    |
| pGADT7-CI3               | R                 | CACCCGGGTGGAATTCTTAATGCTTCAAGGGATA    |
| pGADT7-CI4               | F                 | GGAGGCCAGTGAATTCATGGCGCCCCCTTCCCTCT   |

|                           |   |                                         |
|---------------------------|---|-----------------------------------------|
| pGADT7-CI4                | R | CACCCGGGTGGAATTCTTATGCGACGAACAGCTCT     |
| pGADT7-CI5                | F | GGAGGCCAGTGAATTCATGGTCGGCGCAACCATG      |
| pGADT7-CI5                | R | CACCCGGGTGGAATTCTCACTTGTAGGCATACTT      |
| YNE-TaG6PDH2              | F | GCCTACTAGTGGATCCATGGCGCTCTCCTGCA        |
| YNE-TaG6PDH2              | R | CGAGGTCGACGGATCCCTAGTGTTCCGAGCCGCCCA    |
| YCE-TaGrxS4               | F | CGCCACTAGTGGATCCATGGCGAGGCTGGTGTC       |
| YCE-TaGrxS4               | R | TACTATCGATGGATCCTCACTGGGCACTGTCTTG      |
| pCAMBIA 1300-LUC-TaG6PDH2 | F | ACGGGGGACGAGCTCGGTACCATGGCGCTCTCCTGCA   |
| pCAMBIA 1300-LUC-TaG6PDH2 | R | CGCGTACGAGATCTGGTCGACGTGTTCCGAGCCGCCCA  |
| pCAMBIA 1300-LUC-TaGrxS4  | F | ACGGGGGACGAGCTCGGTACCATGGCGAGGCTGGTGTC  |
| pCAMBIA 1300-LUC-TaGrxS4  | R | CGCGTACGAGATCTGGTCGACTCACTGGGCACTGTCTTG |

**Supplementary Table S3** *Saccharomyces cerevisiae* mutant strains and complementation strains used in this study.

| Strains                         | Genotype/comment                                               |
|---------------------------------|----------------------------------------------------------------|
| $\Delta zwf1$                   | YNL241c mutant                                                 |
| $\Delta zwf1$ +empty            | $\Delta zwf1$ complemented with pDR195 vector                  |
| $\Delta zwf1$ + <i>TaG6PDH2</i> | $\Delta zwf1$ complemented with pDR195- <i>TaG6PDH2</i> vector |

YNL241c (glucose-6-phosphate dehydrogenase, MET19, POS10, ZWF1)
